# Supplementary material for: Oxygen self-supplied upconversion nanoplatform loading cerium oxide for amplified photodynamic therapy of hypoxic tumors
Source: Royal Society of Chemistry journal article supplement (doi:10.1039/d2bm01455f), 2022-11-04
Supplement: d2bm01455f1.pdf [file d2bm01455f1.pdf]

Supporting Information

**Oxygen Self-supplied Upconversion Nanoplatform Loading Cerium Oxide for Amplified Photodynamic Therapy of Hypoxic Tumors**

Yunjian Xu<sup>a,b,c</sup>, Kexin Wang<sup>a</sup>, Zhenjiang Chen<sup>a</sup>, Rui Hu<sup>a</sup>, Yihua Zhao<sup>a</sup>, Xiang Li<sup>a</sup>, Junle Qu<sup>a</sup> and Liwei Liu<sup>a,\*</sup>

<sup>a</sup>Key Laboratory of Optoelectronic Devices and Systems of Guangdong Province & Ministry of Education, College of Physics and Optoelectronic Engineering Shenzhen University, Shenzhen, Guangdong Province, 518060, P. R. China

<sup>b</sup>Science and Technology Innovation Center, Shandong First Medical University & Shandong Academy of Medical Sciences, Jinan, 250100, China

<sup>c</sup>Department of Radiology, Shandong First Medical University & Shandong Academy of Medical Sciences, Jinan, 250100, China

\*E-mail: liulw@szu.edu.cn

\*Tel: +86-755-86526746

The manuscript was coauthored by Yunjian Xu (mssn789@szu.edu.cn), Kexin Wang (wangkexin2020@email.szu.edu.cn), Zhenjiang Chen (1910454027@email.szu.edu.cn), Rui Hu (rhu@szu.edu.cn), Yihua Zhao (zhaoyhxs@126.com), Xiang Li (2050453005@email.szu.edu.cn) Junle Qu (jlqu@szu.edu.cn) and Liwei Liu (Corresponding author, E-mail: liulw@szu.edu.cn).

## **Contents**

### **Part I. Supplemental Fig.s**

Part I. Supplemental Fig.s

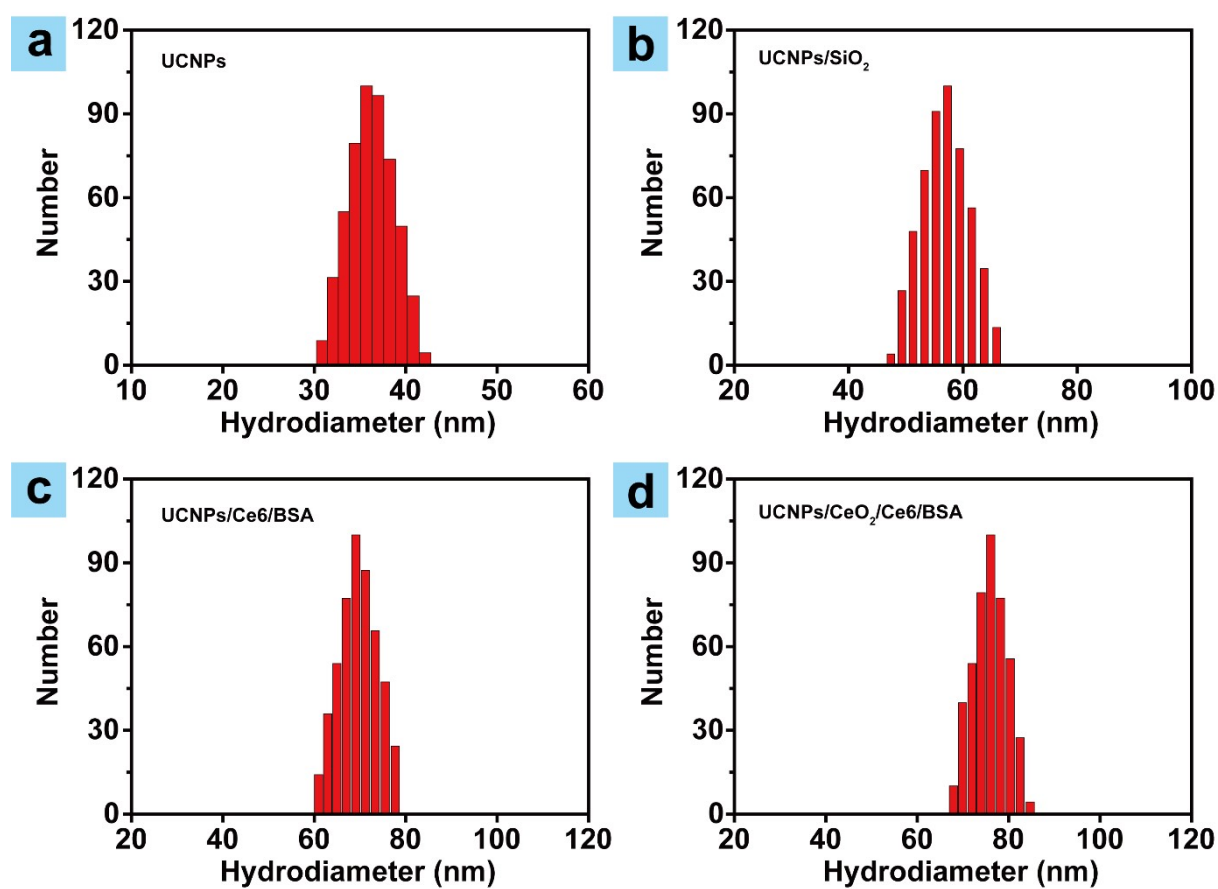

**Fig. S1.** (a), (b), (c), and (d) are DLS results of UCNPs, UCNPs/SiO<sub>2</sub>, UCNPs/Ce6/BSA and UCNPs/CeO<sub>2</sub>/Ce6/BSA corresponding to TEM, respectively.

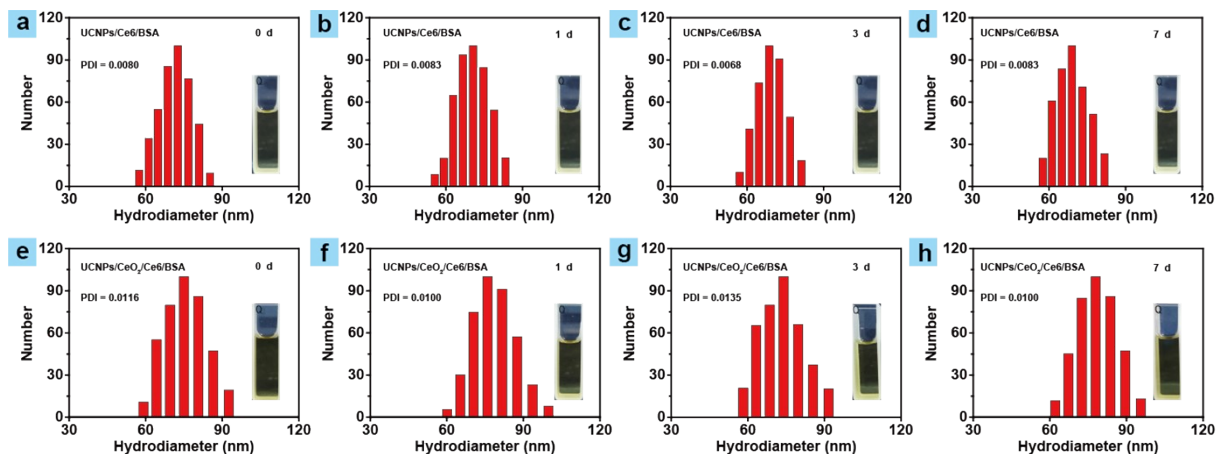

**Fig. S2.** (a) - (d) and (e) - (h) are DLS results of UCNPs/Ce6/BSA and UCNPs/CeO<sub>2</sub>/Ce6/BSA in PBS (pH = 7.4) at various time, respectively. Inset are corresponding BSA solution of samples.

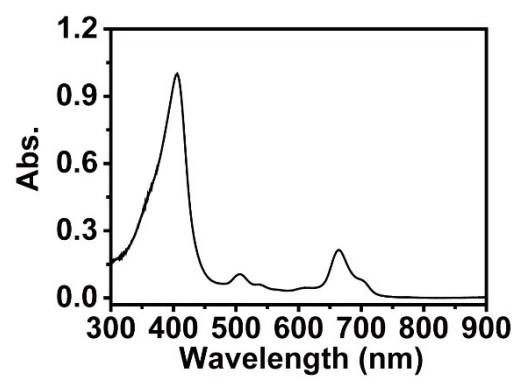

**Fig. S3.** Absorption spectrum of Ce6/BSA in PBS (pH = 7.4). The intensity has been normalized.

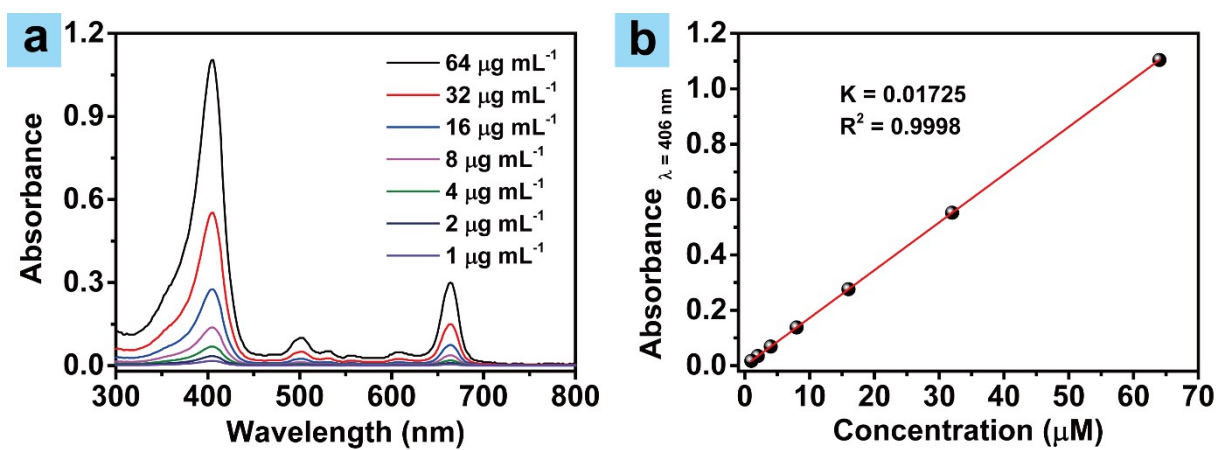

**Fig. S4.** (a) Concentration-dependent absorption spectra and (b) absorbance at 406 nm of Ce6 in DMSO, respectively.

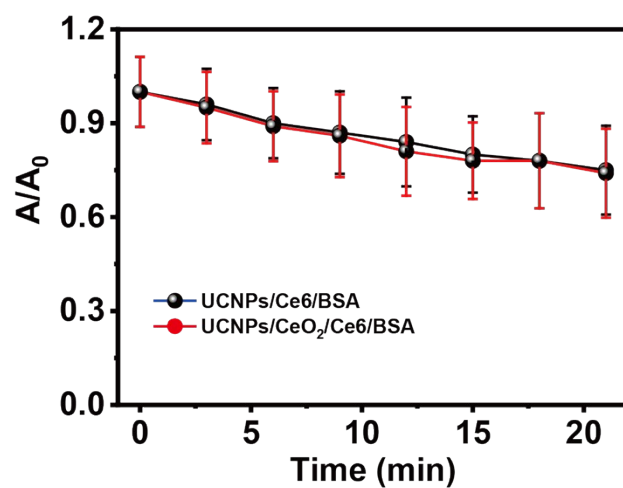

**Fig. S5.**  $A/A_0$  vs irradiation time.  $A_0$  and  $A$  are the characteristic absorbances of ABDA and UCNPs/Ce6/BSA or UCNPs/CeO<sub>2</sub>/Ce6/BSA mixture in PBS before and after irradiation (808 nm, 1.0 W cm<sup>-2</sup>) with time, respectively.

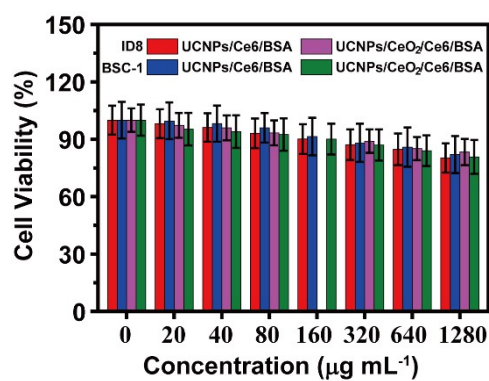

**Fig. S6.** Viabilities of ID8 and BSC-1 cells after incubation with UCNPs/Ce6/BSA and UCNPs/CeO<sub>2</sub>/Ce6/BSA in different concentrations for 24 h, respectively.

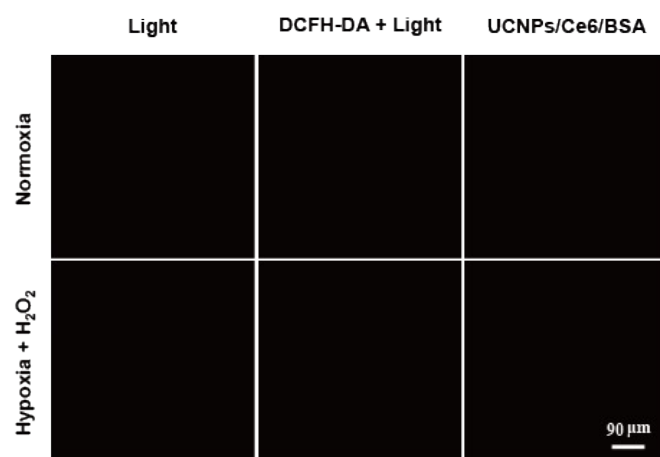

**Fig. S7.** Confocal imaging of ID8 cells with different treatments for <sup>1</sup>O<sub>2</sub> generation under normoxic and hypoxic conditions, respectively.

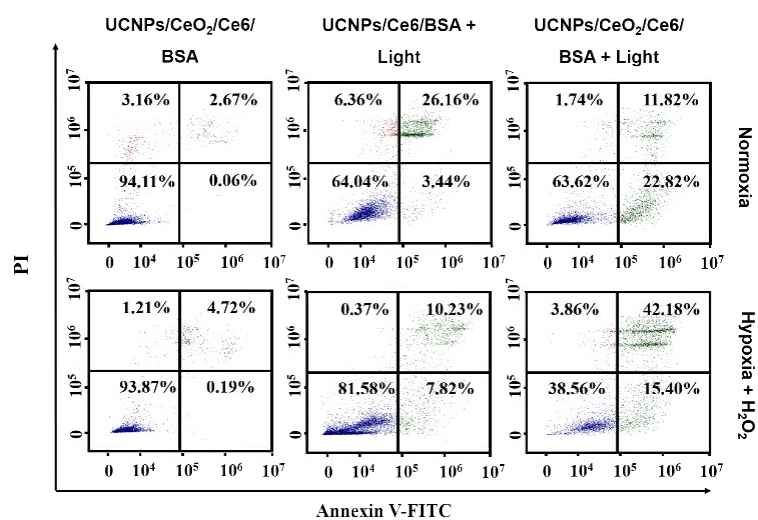

**Fig. S8.** Flow cytometric analysis was used for evaluating PDT capabilities of UCNPs/Ce6/BSA and UCNPs/CeO<sub>2</sub>/Ce6/BSA on ID8 cells with different treatments, respectively.

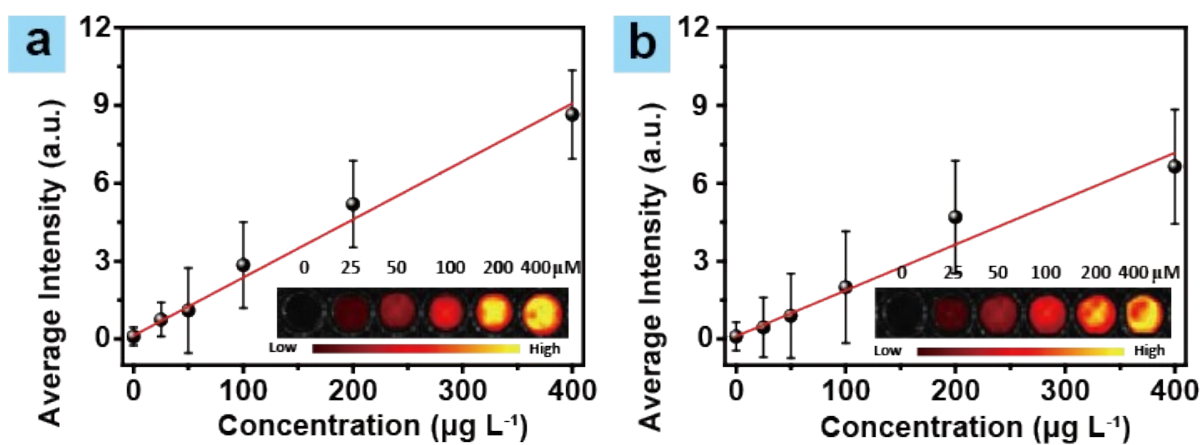

**Fig. S9.** Concentration-dependent fluorescence intensity of (a) UCNPs/Ce6/BSA and (b) UCNPs/CeO<sub>2</sub>/Ce6/BSA in PBS (pH = 7.4), respectively. Inset: Fluorescence intensity photos of (a) UCNPs/Ce6/BSA and (b) UCNPs/CeO<sub>2</sub>/Ce6/BSA in different concentrations, respectively.

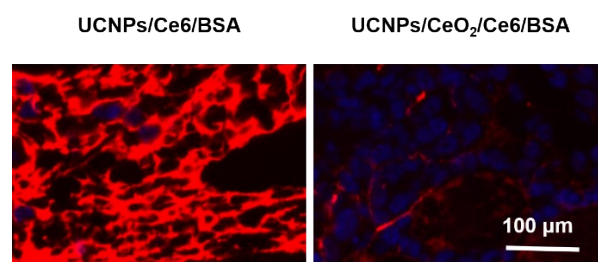

**Fig. S10.** The hypoxic immunofluorescence results of tumor slices with various treatments. The red color is for the content of HIF-1 $\alpha$ . All images share the same bar.

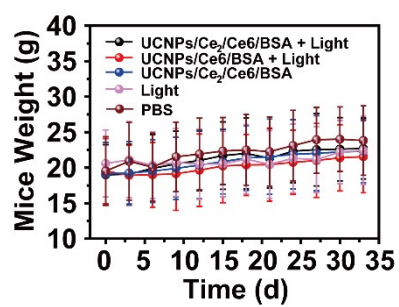

**Fig. S11.** The weight of mice after treatment with PBS, light, UCNPs/CeO<sub>2</sub>/Ce6/BSA, UCNPs/Ce6/BSA + light, and UCNPs/CeO<sub>2</sub>/Ce6/BSA + light for 33 d, respectively.

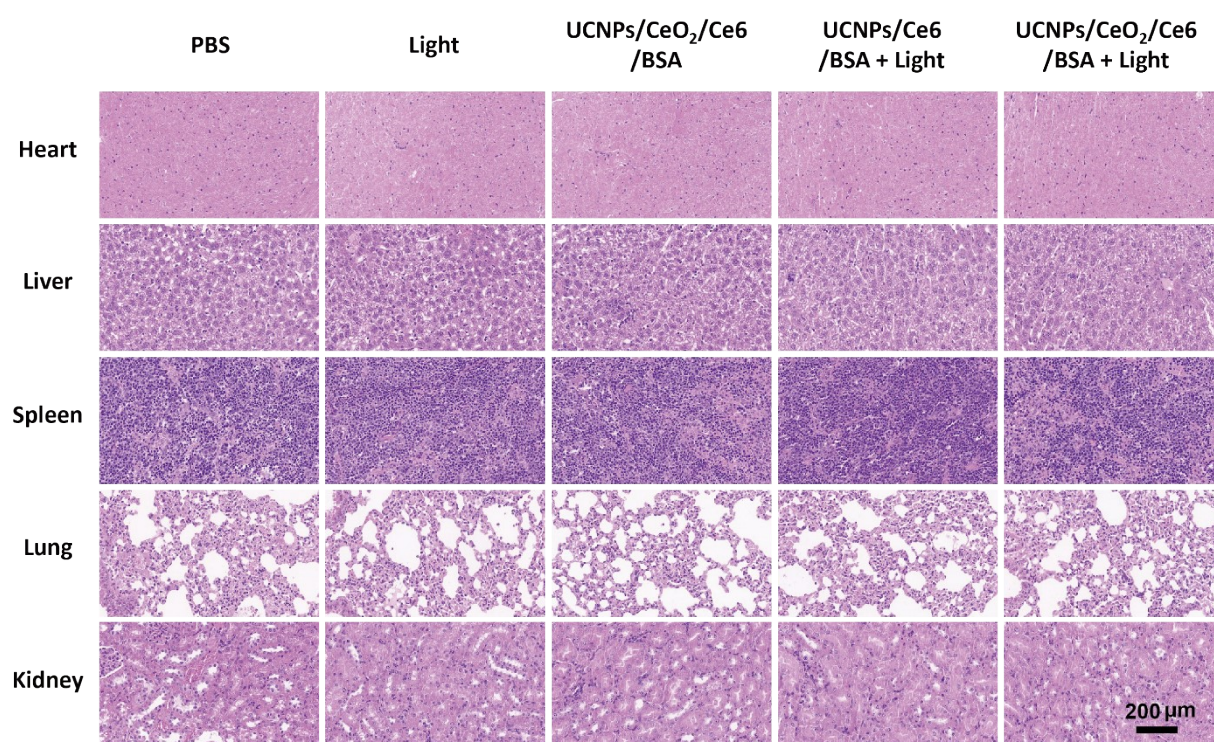

**Fig. S12.** H&E staining of mice major organs after treated with PBS, light, UCNPs/CeO<sub>2</sub>/Ce6/BSA, UCNPs/Ce6/BSA + light, and UCNPs/CeO<sub>2</sub>/Ce6/BSA + light for 33 d, respectively.
